# Supplementary material for: An electrochemical sensor based on enzyme-free recycling amplification for sensitive and specific detection of miRNAs from cancer cells
Source: Royal Society of Chemistry journal article supplement (doi:10.1039/d0an00275e), 2020-01-01
Supplement: d0an00275e1.pdf [file d0an00275e1.pdf]

## Electronic Supplementary Information

### An electrochemical sensor based on enzyme-free recycling amplification for sensitive and specific detection of miRNAs from cancer cells

Lili Jiang<sup>a</sup>, Yuling Yang<sup>a</sup>, Yuhong Lin<sup>a</sup>, Ziyi Chen<sup>a</sup>, Chao Xing<sup>a</sup>, Chunhua Lu<sup>a\*</sup>, Huanghao Yang<sup>a</sup>  
and Shusheng Zhang<sup>b\*</sup>

<sup>a</sup> MOE Key Laboratory for Analytical Science of Food Safety and Biology, Fujian Provincial Key Laboratory of Analysis and Detection Technology for Food Safety, State Key Laboratory of Photocatalysis on Energy and Environment, College of Chemistry, Fuzhou University, Fuzhou 350108, P.R. China

<sup>b</sup> Collaborative Innovation Center of Tumor Marker Detection Technology, Equipment and Diagnosis-Therapy Integration in Universities of Shandong, College of Chemistry and Chemical Engineering, Linyi University, Linyi 276005, P.R. China

Corresponding author. Tel.: +86-591-22866135

E-mail address: chunhualu@fzu.edu.cn shushzhang@126.com

## **Experimental section**

### **Materials and Reagents**

All miRNA and DNA sequences were synthesized from Sangon Biotechnology Company, Ltd. (Table S1). Tris(2-carboxyethyl) phosphine hydrochloride (TCEP) and 6-Mercaptohexanol (MCH) supplied by Sigma (St. Louis, MO, USA). All solutions were prepared with ultrapure water (Milli-Q, 18 M $\Omega$ ·cm resistivity at 25 °C, Merck Millipore) without further purification.

### **Cell Culture and extraction of total RNA from cells**

The human breast cancer cells (MCF-7) and human cervical cancer cells (HeLa) were elaborately cultured in RPMI 1640 medium (Hyclone), which was supplemented with 10 % fetal bovine serum (FBS, Hyclone) and 100 IU/mL penicillin-streptomycin in humidified chamber containing 5% CO<sub>2</sub> at 37 °C. The RNA samples were obtained from HeLa and MCF-7 cells through the ExCellenCT Lysis Kit by following the manufacturer's proposed protocol.

### **Non-denaturing polyacrylamide gel electrophoresis (PAGE)**

The samples were mixed with the DNA-loading buffer (volume ratio 5:1), and then examined by polyacrylamide-gel electrophoresis (PAGE) on a freshly prepared 16 % polyacrylamide gel in 1 × TBE buffer at 100 V for 60 min. Polyacrylamide-gel electrophoresis (PAGE) was conducted with a Bio-Rad imaging system (Hercules, CA).

### **Electrochemical Measurements**

Electrochemical measurements were carried out with a CHI 660D workstation (CH Instruments Inc., Shanghai, China) using a conventional three-electrode configuration that consisted of the platinum wire auxiliary electrode, the Ag/AgCl reference electrode and the working AuE (2 mm in diameter). Square wave voltammetry (SWV) was performed in PBS (10 mM) with a step potential of 4 mV, a frequency of 25 Hz, and an amplitude of 25 mV. The electrochemical impedance spectroscopy (EIS) experiments were performed using 20 mM [Fe (CN)<sub>6</sub>]<sup>3-/4-</sup> containing 1 M KCl with a frequency ranging from 1 to 10<sup>5</sup> Hz and amplitude set at 5 mV.

**Table S1. Sequences of the oligonucleotides (in 5' to 3' direction)**

| Oligonucleotide | Sequence (from 5' to 3' )                                                      |
|-----------------|--------------------------------------------------------------------------------|
| H0              | AGT GTC ACG TTC CTG TGT TGA CTC AAC ATC AGT CTG ATA AGC TAA GTC<br>AAC ACA GGA |
| H0-141          | AGT GTC ACG TTC CTG TGT TGA CCC ATC TTT ACC AGA CAG TGT TAC GTC<br>AAC ACA GGA |
| H1              | GTC AA CAG AGG AAC GTG ACA CTC ATG GAT GCT CAG TGT CAC GTT CCT                 |
| H2              | TGA CAC TGA GCA TCC ATG AGT GTC ACG TTC CTC ATG GAT GCT CGT C                  |
| L               | GAC GAG CAT CCA TGG TGT TGA C                                                  |
| S-MB            | GTC AAC ACC ATG GAT-MB                                                         |
| S               | GTC AAC ACC ATG GAT                                                            |
| CP              | SH-(CH <sub>2</sub> ) <sub>6</sub> -CAC ATC ATC CAT GGT GTT                    |
| MiRNA-21        | UAG CUU AUC AGA CUG AUG UUG A                                                  |
| MiRNA-141       | UAA CAC UGU CUG GUA AAG AUG G                                                  |
| MiRNA-21(1)     | UAG CUU AUC <u>AAA</u> CUG AUG UUG A                                           |
| MiRNA-21(3)     | <u>UCG</u> CUU AUC <u>GGA</u> CUG AUC <u>UUG</u> A                             |

**Table S2. Comparison of different methods for the detection of miRNA**

| method           | strategy                                                                                          | Linear range     | LOD            | Ref       |
|------------------|---------------------------------------------------------------------------------------------------|------------------|----------------|-----------|
| Fluorescence     | Catalytic hairpin assembly and enzymatic repairing amplification                                  | 100 fM -100 nM   | 50 fM          | 38        |
| Fluorescence     | An ATP-fueled nucleic acid signal amplification                                                   | 50 pM - 10nM     | 18pM           | 39        |
| Fluorescence     | Magnetic microbead-assisted catalyzed hairpin assembly                                            | 0.1 nM - 4 nM    | 34 pM          | 40        |
| SERS             | Multicolor Gold-Silver Nano-Mushrooms                                                             | 10 fM - 100 pM.  | 10 fM          | 41        |
| Electrochemistry | Exonuclease-III-assisted target recycling amplification and mismatched catalytic hairpin assembly | 100 fM - 5 nM    | 92 fM          | 42        |
| Electrochemistry | Exonuclease-assisted target recycling                                                             | 0.01 pM - 100 pM | 3.5 fM         | 43        |
| Electrochemistry | sandwich assay onto magnetic microcarriers and hybridization chain reaction amplification         | 0.2 nM - 5.0 nM  | 60 pM          | 44        |
| Electrochemistry | A Zinc finger protein specific to DNA-RNA hybrids                                                 | 2 fM -1 nM       | 2 fM           | 45        |
| Electrochemistry | Dendritic DNA/PNA assembly                                                                        | 0.1 pM - 10 nM   | 100 fM         | 46        |
| Electrochemistry | A triple-helix molecular switch                                                                   | 0.5 pM - 80 pM   | 0.12 pM        | 47        |
| Electrochemistry | Catalytic hairpin assembly and DNA three-way junction                                             | 10 fM-10 nM      | 3.6 fM /4.5 fM | This work |

**Detection of miRNA in the serum-containing environment**

To further investigate the application of this proposed method for real sample analysis, the target miRNA-21 was detected in human serum samples using a standard addition method. With this purpose, three different concentrations of miRNA (10, 100 and 1000 pM) were added to the 10-fold diluted healthy human serum samples and measured using the fabricated biosensor. As shown in Table S3, the recovery values and RSD for the test samples were in the range of 97.2-104.5% and 2.8-5.3%, respectively. These results clearly indicate that the fabricated biosensor has promising application for detecting diverse miRNAs in complex samples.

**Table S3. Detection of miRNA-21 in human serum samples (n=5).**

| Sample | Added (pM) | Found (pM) | Recovery (%) | RSD (%) |
|--------|------------|------------|--------------|---------|
| 1      | 10         | 10.5       | 105          | 5.3     |
| 2      | 100        | 97.2       | 97.2         | 2.8     |
| 3      | 1000       | 1045       | 104.5        | 3.9     |

Mean value of five parallel determination in the optimal experiment conditions.

## Characterization of proposed biosensor strategy by PAGE

The detail PAGE image was shown in Fig. S1. The target miRNA-21, H0, H1, H2, CP, S, L were corresponded to the bands from lane 1 to lane 4, lane 16 to lane 18, respectively. The mixture of T and H0 showed new band (lane 5) at different from the miRNA-21 and H0 (lane 1, 2), which resulted from the hybridization of H0 with miRNA-21 (T/H0 complexes). T/H0 complexes can exist as a trigger for CHA reactions. No new band appeared in the mixture of H0, H1 and H2 in the absence of target miRNA (lane 8), indicating that all hairpin reactants were stable and without false hybridizations. Upon the addition of target miRNA, a new band of high molecular weight appeared (lane 9), which was indicative of the formation of the H1/H2 complex. As expected, CHA was triggered by the T/H0 duplex. Lanes 9–18 show the formation of the DNA TWJ and the capturing capability of the CP strand. When the three hairpins (H0, H1 and H2), L/S and CP were incubated with target miRNA, the bands of H1/H2, L/S and CP attenuated with the appearance of larger molecular weight product band (DNA TWJ) and a new band corresponding to the S/CP complex (lane 12). This phenomenon was due to the hybridization of L with the H1/H2 complex to form the stable DNA TWJ complex, and the separation of S from the L/S duplex reacted with CP. No new band was observed in the presence of miRNA-21 (lane 11). While the control experiments in lane 6, 7, 9, 10, 13, 14 and 15 showed the hybridization conditions of other DNA combinations, further proved that target played a critical role in accomplishment of CHA- DWJ system. Taken collectively, these results show that the formation of the DNA TWJ was specific for target-induced assembly, and the CHA-DNA TWJ strategy was highly specific for miRNA detection.

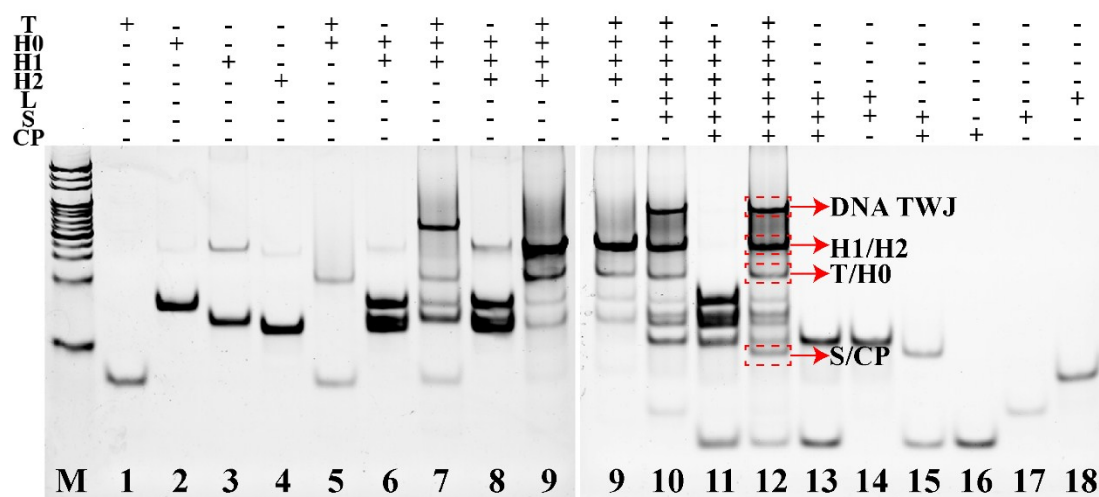

Fig. S1. The PAGE characterization of CHA and the DNA TWJ strategy.

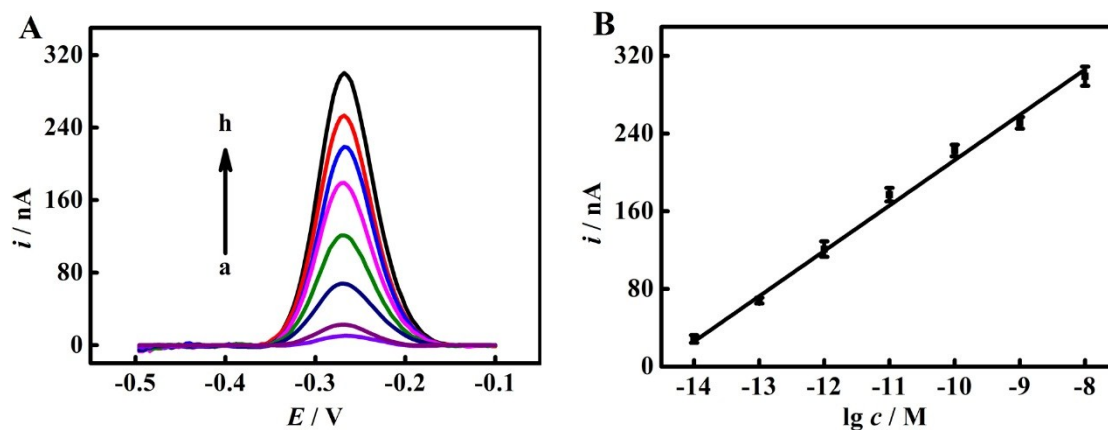

Fig. S2. (A) SWV current responses of the present biosensor to different concentrations of miRNA-141 (from a to g: 0, 10 fM, 100 fM, 1 pM, 10 pM, 100 pM, 1 nM and 10 nM), (B) Calibration plot of the SWV peak current versus the logarithm of the miRNA-141 concentration. Error bars: SD;  $n = 3$ .

## Reference

- 38 C. Zhang, Y. Tang, Y. Sheng, H. Wang, Z. Wu, J. Jiang, *Chem. Commun.*, 2016, **52**, 13584-13587.
- 39 Z. Wen, W. Liang, Y. Zhuo, C. Xiong, Y. Zheng, R. Yuan, Y. Chai, *Chem. Commun.*, 2018, **54**, 10897-10900.
- 40 H. Fang, N. Xie, M. Ou, J. Huang, W. Li, Q. Wang, J. Liu, X. Yang, K. Wang, *Anal. Chem.*, 2018, **90**, 7164-7170.
- 41 J. Su, D. Wang, L. Norbel, J. Shen, Z. Zhao, Y. Dou, T. Peng, J. Shi, S. Mathur, C. Fan, S. Song, *Anal. Chem.*, 2017, **89**, 2531-2538
- 42 Campuzano, S., R. M. Torrente-Rodriguez, E. Lopez-Hernandez, F. Conzuelo, R. Granados, J.M. Sanchez-Puelles, J. M. Pingarron, *Angew. Chem. Int. Ed.*, 2014, **53**, 6168-6171.
- 43 Z. Chen, Y. Xie, W. Huang, C. Qin, A. Yu, G. Lai, *Nanoscale*, 2019, **11**, 11262-11269
- 44 Torrente-Rodriguez, R. M., S. Campuzano, V. R. Montiel, J. J. Montoya, J. M. Pingarron, *Biosens. Bioelectron.*, 2016, **86**, 516-521
- 45 C. Fang, K. Kim, B. Yu, S. Jon, M. S. Kim, H. Yang, *Anal. Chem.*, 2017, **89**, 2024-2031.
- 46 F. Xuan, T. W. Fan, I. M. Hsing, *ACS Nano*, 2015, **9**, 5027-5033.
- 47 E. Xu, Z. Li, X. Zhang, J. Zhou, X. Yan, Y. Liu, J. Chen, *Anal. Chem.*, 2017, **89**, 8830-8835.
